RESEARCH ARTICLE

# Effect of race and sex on lupus diagnosis in primary care: A randomized factorial survey study

Alyssa Howren<sup>1</sup>, Quan L. Tran<sup>2</sup>, Sadaf Sediqi<sup>1</sup>, Saadiya Hawa<sup>3</sup>, Douglas K. Owens<sup>4</sup>, Eleni Linos<sup>1,5</sup>, Titilola O. Falasinnu<sup>6,7</sup>, Yashaar Chaichian<sup>7</sup>, Julia F. Simard<sup>1,7\*</sup>

**1** Department of Epidemiology and Population Health, Stanford School of Medicine, Stanford, California, United States of America, **2** Department of Medicine, Stanford School of Medicine, Stanford, California, United States of America, **3** Graduate Medical Education, Department of Internal Medicine, Weiss Memorial Hospital, Chicago, Illinois, United States of America, **4** Department of Health Policy, Stanford School of Medicine, Stanford, California, United States of America, **5** Department of Dermatology, Stanford School of Medicine, Stanford, California, United States of America, **6** Department of Anesthesiology, Perioperative and Pain Medicine, Stanford School of Medicine, Stanford, California, United States of America, **7** Division of Immunology and Rheumatology, Department of Medicine, Stanford School of Medicine, Stanford, California, United States of America,

\* [jsimard@stanford.edu](mailto:jsimard@stanford.edu)

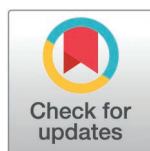

## OPEN ACCESS

**Citation:** Howren A, Tran QL, Sediqi S, Hawa S, Owens DK, Linos E, et al. (2026) Effect of race and sex on lupus diagnosis in primary care: A randomized factorial survey study. PLoS One 21(2): e0342328. <https://doi.org/10.1371/journal.pone.0342328>

**Editor:** Wesam Gouda, Prime Hospital LLC, UNITED ARAB EMIRATES

**Received:** September 8, 2025

**Accepted:** January 21, 2026

**Published:** February 6, 2026

**Copyright:** © 2026 Howren et al. This is an open access article distributed under the terms of the [Creative Commons Attribution License](https://creativecommons.org/licenses/by/4.0/), which permits unrestricted use, distribution, and reproduction in any medium, provided the original author and source are credited.

**Data availability statement:** The de-identified dataset and corresponding data dictionary are available on the Open Science Framework at [https://osf.io/npr5f/overview?view\\_only=9b-6106c95d19493288e7fa0c276c0284](https://osf.io/npr5f/overview?view_only=9b-6106c95d19493288e7fa0c276c0284).

**Funding:** National Institutes of Health Award# R01AI154533 Authors receiving award: JFS

## Abstract

### Background

Systemic lupus erythematosus (SLE) is a heterogeneous autoimmune rheumatic disease whose epidemiology and clinical prognosis vary by race and sex. Observed disparities in SLE may be partly attributable to cognitive processes in clinical decision-making, which can influence diagnostic accuracy and clinical management. We aimed to examine variation in primary care physicians' (PCP) diagnosis and management of SLE when all content of a clinical case is identical, apart from race and sex.

### Methods

We distributed an online randomized factorial survey from 04/11/2024–06/10/2024 to PCPs across the US. Participants were presented with one of four possible SLE vignettes – Black female, White female, Black male, White male – for which all other clinical content was identical. Block randomization was used to randomly modify the race (Black/White) and sex (female/male) of the SLE “case”. Primary outcomes were correct text-based responses for SLE diagnosis at initial case presentation and after reviewing additional lab results. Secondary outcomes were participants' review time and planned next steps (treatment, referral, tests) as a proxy for cognitive bias and certainty, respectively. We calculated descriptive statistics for all outcomes stratified by assigned randomized factor and used chi-square tests to evaluate between-group differences.

(principal investigator), DO, YC Canadian Institutes of Health Research - Fellowship Award# 472681 Authors receiving award: AH \* funders did not play any role in the study design, data collection and analysis, decision to publish, or preparation of the manuscript.

**Competing interests:** The authors have declared that no competing interests exist.

## Results

1031 PCPs (42.7% women, mean age  $52.1 \pm 12.1$  years) completed the case. At initial presentation, 63.9% of participants correctly identified SLE as a differential diagnosis. An initial diagnosis of SLE significantly differed by the race and sex of the case ( $p < 0.001$ ), with the highest proportion of correct diagnoses occurring for Black female cases (72.2%) and lowest for White male cases (55.3%). Median review time for correct initial diagnoses was longest for White male cases (175 s). After participants reviewed lab results, the overall proportion assigning a final diagnosis of SLE (63.9%) remained unchanged from the initial diagnosis.

## Conclusion

A patient's race and sex may influence diagnostic accuracy and clinical decision-making for SLE in primary care. The observed variation in diagnostic accuracy, which aligns with the descriptive epidemiology of SLE, highlights the need for targeted interventions to ensure equitable diagnostic processes.

## Introduction

Systemic lupus erythematosus (SLE) is a heterogeneous autoimmune rheumatic disease whose epidemiology and clinical prognosis vary by race and sex. SLE is a female-predominant disease, with CDC National Lupus Registries estimating a nine-fold higher prevalence for females than males (128.7 versus 14.6 per 100,000) [1]. The California Lupus Surveillance Project reported a six-fold higher incidence rate among Black females compared to White females (30.5 versus 5.3 per 100,000 person-years) [2]. These estimates far exceed incidence of SLE among Black (2.1 per 100,000 person-years) and White males (0.6 per 100,000 person-years) [2]. Nonetheless, males are more likely to have severe manifestations at diagnosis, such as lupus nephritis and thrombocytopenia, and have a poorer prognosis [1,3,4].

Biological factors and social determinants are thought to underlie sex- and gender-based disparities in SLE epidemiology and clinical outcomes [5]. Adherence to traditional masculine norms and decreased health-seeking behaviors may also contribute to greater disease severity and poorer prognosis at the time of a clinical diagnosis in males [6,7]. Further, racial differences in SLE severity have been attributed to social determinants of health, including dimensions of socioeconomic status and racial discrimination [8]. Additionally these disparities, to some degree, may arise from cognitive errors during clinical decision-making [9,10]. Is it possible that physicians place selective attention on the "classic" case of SLE, thereby delaying diagnosis among less representative cases and inadvertently perpetuating these disparities? This representativeness bias was observed in pilot work showing rheumatologists were less likely to diagnose SLE for hypothetical male cases, particularly White males, despite identical clinical history, symptoms, and serology [10]. To expand on this work, we conducted a factorial survey experiment to examine whether

randomly assigned patient race and sex affect the likelihood that primary care physicians (PCPs), who are often the first point of care, accurately diagnose SLE when all other clinical content remains identical. Secondly, we investigated how PCPs subsequent actions, including ordering tests and referrals, varied by the randomly assigned race and sex of the case.

## Materials and methods

### Survey design

We developed an online factorial survey experiment using Qualtrics (Qualtrics, Provo, UT) comprising six clinical vignettes, one of which described SLE. We modified an existing SLE vignette from our rheumatologist experiment to better represent a primary care setting [10]. Principal clinical features of SLE described in the vignette included history of fever, intermittent joint pain and stiffness, photosensitivity but no rash, and fatigue (S1 Appendix). For each survey participant, the race (Black/White) and sex (female/male) of the “case” were randomly assigned, and all other social and clinical content describing symptoms, medical history, physical exam, and laboratory results remained constant. Participants were first presented with symptoms, medical history, and physical exam findings and asked, “What are the top three diagnoses on your differential?” and then, “What do you plan to do next?” with options to either observe and see how the disease progresses or conduct further investigations. Those electing further investigation were asked to choose and elaborate on immediate next step(s): order testing, initiate treatment, and/or refer. Finally, participants were presented additional laboratory findings and asked, “What is the most likely diagnosis?” (S1 Fig).

The survey was pilot tested among 13 PCPs affiliated with Stanford Medicine blinded to the survey’s purpose from 02/12/2024–03/13/2024 to assess the block randomization and optimize the clinical vignettes. Pilot stage participants received a \$20 incentive, and their survey data were excluded from the analysis.

### Survey distribution

The survey was emailed by the research team through Qualtrics between 04/11/2024 and 05/22/2024 to US PCPs using an email distribution list from a medical marketing company (Lake B2B/Span Global Services). Participants were initially offered a \$30 incentive distributed by Tango Rewards, which was increased to \$50 on 05/06/2024 to help reach a target of 1000 respondents. Altogether, five reminder emails were sent, and the survey closed 06/10/2024.

### Study population

Eligible participants were those identifying as a PCP (family medicine/general practice, or internal medicine residency) at initial screening. We excluded participants living outside the US ( $n=4$ ), giving insincere responses (e.g., numbers, ‘X’, cancer for all diagnoses,  $n=2$ ), and reporting an improbable year of birth (e.g., 1900,  $n=1$ ) (S2 Fig).

### Measurements

**Participant demographics.** Participants first answered questions on personal demographics, including age, gender, race, ethnicity, and residence. Information on participants’ clinical experience and practice were also collected, namely: years since completing residency; board certification; where their medical degree was obtained; practice location; practice setting; and focus of work.

**Exposure.** We used Qualtrics’ block randomization to randomly assign the race (Black/White) and sex (female/male) of each case vignette shown to participants. Participants were presented with one of four possible SLE vignettes – Black female, White female, Black male, White male – for which all other content was identical.

**Study outcomes.** The primary outcomes were correct text-based responses for SLE diagnosis after initial case presentation (i.e., top three differential diagnoses) and after reviewing additional lab results (i.e., final diagnosis). The

classification of correct and incorrect responses was determined independently from the randomly assigned sex and race of the case. One author (AH) completed initial categorization, and all diagnostic categories were reviewed by three co-authors (AH, YC, JFS). For correct initial diagnoses, we derived a binary variable to indicate whether a diagnosis of SLE was listed in the top three differential, regardless of assigned rank. We subsequently followed a deductive approach to categorize incorrect responses into several binary disease categories ([S2 Appendix](#)).

We measured participants' review time and planned next steps as a proxy for cognitive bias and certainty, respectively. Participants' review time for each survey question was automatically measured in seconds. Participants' next steps were first assessed by deriving non-mutually exclusive binary variables to indicate whether participants elected to order tests, send referral(s), and/or initiate treatment(s). We then classified participants detailed entries for next steps as binary variables. For example, derived variables indicated whether tests for antinuclear antibodies (ANA) were ordered, or a treatment, such as non-steroidal anti-inflammatory drugs (NSAIDs) was initiated ([S2 Appendix](#)).

We collectively captured final diagnoses with any mention of SLE. We then distinguished between responses that singularly entered SLE (e.g., "lupus") from those including SLE with another differential (e.g., "SLE, seronegative RA"). Incorrect responses were assigned to binary disease categories (see [S2 Appendix](#)).

## Statistical analysis

Participant data were exported from Qualtrics into SAS version 9.4 (SAS Institute Inc., Cary, NC) for data preparation and analyses. Participant demographics were summarized with descriptive statistics. We calculated descriptive statistics for all study outcomes stratified by the randomly assigned race-sex version. We assessed for heterogeneity with respect to the proportion of correct initial and final diagnoses by race-sex version using chi-square tests. Given the initial clinical context of the vignette, which included joint pain and photosensitivity, the anticipated next step endorsed by Siegel et al.'s [11] SLE clinical review is for PCPs to check ANA level. We therefore evaluated the proportion of participants checking ANA level stratified by correct initial diagnosis and race-sex version of the case.

## Ethical approval and participant consent

This study was approved by the Institutional Review Board of Stanford University, Stanford, California (IRB – 42909). Participants completed the written informed consent process online prior to beginning the survey.

## Results

In total, 1031 PCPs (42.7% women,  $52.1 \pm 12.1$  years) finished the survey. Most completed residency  $\geq 11$  years ago (76.4%) and indicated patient care was their main focus (85.7%) ([Table 1](#) and [S1 Table](#) for stratification by race-sex case version).

At initial case presentation, 63.9% (659/1031) of participants correctly identified SLE within their top three differentials. SLE identification at this stage significantly differed by the race and sex of the case, with the highest proportion of correct diagnoses occurring for the Black female version ([Table 2](#)). Participants were more likely to rank SLE as the first differential diagnosis for Black female cases (31.6%), while SLE tended to rank as the second differential diagnosis for the White female (33.6%), Black male (24.9%), and White male cases (28.2%) ([Table 2](#)). Median review time among participants with correct initial diagnoses was the longest for White male vignettes ([Table 3](#)).

Most participants included one or more other rheumatic diseases in their initial differential diagnosis (92.2%, 951/1031) ([S2 Table](#)). When SLE was not an initial differential, 87.9% (327/372) listed another rheumatic disease. Conditions less related to SLE, such as sexually transmitted infections, were included as a differential diagnosis disproportionately (15.8% Black male, 11.8% White male, 8.8% Black female, and 5.1% White female cases). Sarcoidosis was a differential diagnosis for a small margin of participants (21/1031, 2.0%), predominately for Black male (9/21, 42.9%) and Black female cases (10/21, 47.6%).

**Table 1. Participant demographics (n = 1031).**

|                                              |             |
|----------------------------------------------|-------------|
| <b>Characteristic</b>                        |             |
| Age, mean (SD)                               | 52.1 (12.1) |
| <b>Gender, No. (%)</b>                       |             |
| Woman                                        | 440 (42.7)  |
| Man                                          | 588 (57.0)  |
| Not listed                                   | 3 (0.3)     |
| <b>Race, No. (%)</b>                         |             |
| White                                        | 700 (67.9)  |
| Asian                                        | 252 (24.4)  |
| Black                                        | 25 (2.4)    |
| American Indian or Alaska Native             | 2 (0.2)     |
| Pacific Islander or Native Hawaiian          | 2 (0.2)     |
| ≥2 selected                                  | 17 (1.6)    |
| Not listed                                   | 33 (3.2)    |
| <b>Ethnicity, No. (%)</b>                    |             |
| Hispanic                                     | 50 (4.9)    |
| Not Hispanic                                 | 981 (95.2)  |
| <b>Medical school, No. (%)</b>               |             |
| US                                           | 764 (74.1)  |
| International                                | 267 (25.9)  |
| <b>Years since residency, No. (%)</b>        |             |
| Currently in residency                       | 28 (2.7)    |
| <5 years                                     | 80 (7.8)    |
| 5-10 years                                   | 135 (13.1)  |
| 11-20 years                                  | 298 (28.9)  |
| >20 years                                    | 490 (47.5)  |
| <b>Practice setting, No. (%)</b>             |             |
| Private group practice                       | 373 (36.2)  |
| Academic                                     | 317 (30.8)  |
| Multiple settings                            | 125 (12.1)  |
| City or County public hospital               | 85 (8.2)    |
| Retired                                      | 42 (4.1)    |
| Veteran Affairs                              | 38 (3.7)    |
| HMO                                          | 32 (3.1)    |
| Military                                     | 1 (0.1)     |
| Not working (looking to work)                | 4 (0.4)     |
| Not working                                  | 4 (0.4)     |
| Not clinically practicing                    | 10 (1.0)    |
| <b>Clinical work, No. (%)</b>                |             |
| Patient care                                 | 883 (85.7)  |
| Administrative work                          | 62 (6.0)    |
| Education                                    | 60 (5.8)    |
| Research                                     | 26 (2.5)    |
| <b>Location of current practice, No. (%)</b> |             |
| Urban                                        | 458 (44.4)  |
| Suburban                                     | 409 (39.7)  |
| Rural                                        | 164 (15.9)  |

(Continued)

**Table 1.** (Continued)

| Characteristic                         |            |
|----------------------------------------|------------|
| <b>US geographic division, No. (%)</b> |            |
| South Atlantic                         | 182 (17.7) |
| Pacific                                | 179 (17.4) |
| Middle Atlantic                        | 147 (14.3) |
| East North Central                     | 138 (13.4) |
| West North Central                     | 123 (11.9) |
| Mountain                               | 94 (9.1)   |
| West South Central                     | 71 (6.9)   |
| New England                            | 64 (6.2)   |
| East South Central                     | 33 (3.2)   |
| Puerto Rico                            | 0 (0.0)    |

Abbreviations: SD – standard deviation

<https://doi.org/10.1371/journal.pone.0342328.t001>

**Table 2. Proportion of correct diagnoses identified among SLE clinical vignettes with race and sex jointly randomized.**

| Measure                                                    | Race and Sex |              |            |            |
|------------------------------------------------------------|--------------|--------------|------------|------------|
|                                                            | Black female | White female | Black male | White male |
| <b>Initial Diagnosis</b>                                   |              |              |            |            |
| Randomized, No.                                            | 263          | 253          | 253        | 262        |
| Correct diagnosis within differential, No. (%)             | 190 (72.2)   | 172 (68.0)   | 152 (60.1) | 145 (55.3) |
| <i>P</i> for heterogeneity                                 | <0.001       |              |            |            |
| Correct 1 <sup>st</sup> diagnosis, No. (%)                 | 83 (31.6)    | 57 (22.5)    | 55 (21.7)  | 28 (10.7)  |
| Correct 2 <sup>nd</sup> diagnosis, No. (%)                 | 81 (30.8)    | 85 (33.6)    | 63 (24.9)  | 74 (28.2)  |
| Correct 3 <sup>rd</sup> diagnosis, No. (%)                 | 26 (9.9)     | 30 (11.9)    | 34 (13.4)  | 43 (16.4)  |
| <b>Final Diagnosis</b>                                     |              |              |            |            |
| Randomized, No.                                            | 263          | 253          | 253        | 262        |
| Diagnosis of SLE (+/- differential) <sup>a</sup> , No. (%) | 183 (69.6)   | 167 (66.0)   | 153 (60.5) | 156 (59.5) |
| <i>P</i> for heterogeneity                                 | 0.055        |              |            |            |
| Diagnosis of SLE-specific <sup>b</sup> , No. (%)           | 161 (61.2)   | 144 (56.9)   | 133 (52.6) | 129 (49.2) |
| <i>P</i> for heterogeneity                                 | 0.035        |              |            |            |

<sup>a</sup>SLE (+/- differential) refers to participant responses that included SLE and may have also included an additional differential diagnosis (e.g., viral illness).

<sup>b</sup>SLE-specific refers to participant responses that definitively stated SLE.

Abbreviations: SLE – systemic lupus erythematosus

<https://doi.org/10.1371/journal.pone.0342328.t002>

Upon initial case presentation, most participants elected to order tests (91.9%, 947/1031) and only 7.9% (81/1031) chose to send a referral (95.1% were to rheumatology (77/81)). Overall, 69.5% (717/1031) of participants ordered an ANA test. Among participants with SLE as an initial differential diagnosis, 78.9% (520/659) listed ANA in their lab orders and 9.0% (59/659) ordered rheumatology panels. Participants including SLE on their differential more frequently ordered ANA tests for White male cases (84.8%, 123/145), followed by Black female (80.0%, 152/190), Black male (75.7%, 115/152), and White female (75.6%, 130/172) cases. Fewer PCPs ordered ANA tests (53.0%, 197/372) when SLE was not a differential. A small proportion of participants (5.6%, 58/1031) elected to initiate treatment, most commonly NSAIDs (51.7%, 30/58) and corticosteroids (24.1%, 14/58).



**Table 3. Median time (in seconds) for participants to establish an initial and a final diagnosis.**

| Measure                              | Race and Sex        |                    |                    |                     |
|--------------------------------------|---------------------|--------------------|--------------------|---------------------|
|                                      | Black female        | White female       | Black male         | White male          |
| <b>Initial Diagnosis</b>             |                     |                    |                    |                     |
| Correct <sup>a</sup> , seconds (IQR) | 154.0 (97.7-277.9)  | 133.0 (86.1-224.7) | 139.4 (87.9-219.9) | 175.2 (117.2-348.2) |
| Incorrect, seconds (IQR)             | 175.4 (100.5-261.5) | 152.5 (82.7-242.7) | 138.1 (96.3-256.7) | 167.5 (117.2-267.6) |
| <b>Final Diagnosis</b>               |                     |                    |                    |                     |
| Correct <sup>a</sup> , seconds (IQR) | 49.4 (32.7-94.7)    | 48.6 (30.9-71.0)   | 48.7 (29.5-88.5)   | 55.1 (34.5-115.8)   |
| Incorrect, seconds (IQR)             | 59.3 (40.2-114.4)   | 54.4 (37.5-86.5)   | 65.6 (35.9-104.2)  | 65.9 (40.7-129.5)   |

<sup>a</sup>Correct if SLE included in top three initial differential diagnosis independent of assigned rank.

<sup>b</sup>Correct if response listed SLE and may have also included an additional differential diagnosis.

Abbreviations: IQR – interquartile range; SLE – systemic lupus erythematosus

<https://doi.org/10.1371/journal.pone.0342328.t003>

After reviewing lab results, the net final diagnosis of SLE (63.9%, 659/1031) was similar to the initial diagnosis. This was not entirely due to participants maintaining their initial answers. A subset of PCPs switched between correct and incorrect diagnoses (**Fig 1**). Overall, a final diagnosis of SLE occurred more often for female versus male vignettes (**Table 2**). Other rheumatic diseases (e.g., rheumatoid arthritis) were the final diagnoses assigned by 23.0% (237/1031) of participants. Infectious arthritis and general infections were common incorrect diagnoses for Black and White male cases, respectively (**Fig 2**). The time to correct diagnosis in the final stage was again longest for White male vignettes (**Table 3**).

## Discussion

Despite identical clinical information, a PCP's diagnosis of SLE appeared to significantly vary by the race and sex of the patient in the vignette. The highest accuracy at initial diagnosis occurred for Black female cases and persisted at the final diagnosis even after reviewing additional lab results. The lowest accuracy at initial diagnosis occurred for White male cases. Further, review times for correct initial and final diagnoses varied by race-sex version, with the longest times for White male cases. Assessment of planned next steps indicated participants who listed SLE as a differential diagnosis were more likely to check ANA levels for White male cases. While these findings reflect diagnostic tendencies and cognitive processes under standardized, vignette-based conditions, they nonetheless highlight the need to identify strategies for addressing diagnostic inaccuracies and promoting equitable diagnostic processes for all patients.

As one might expect, we observed that PCPs variable diagnostic accuracy by race and sex aligns with the distribution of SLE's descriptive epidemiology, despite all other elements of the clinical vignette being held constant. The evidence base that informs clinical training, and thereby development of cognitive heuristics, characterizes SLE as a female-predominant disease disproportionately affecting populations of color [1,2,12]. The greater likelihood of PCPs to underdiagnose SLE in male cases, may suggest that diagnostic disparities in SLE are partly influenced by a conscious or unconscious reliance on the representativeness heuristic. In other words, PCPs may be using a cognitive shortcut that assesses the probability of SLE based on its typical presentation and population-level prevalence, which could impact their diagnostic decisions [13]. By relying, and perhaps over-relying on their prior, they may miss, or undervalue, important clinical details in the male cases, for example. Further, our finding that PCPs required more time to correctly diagnose SLE for White male cases may demonstrate that it takes longer to overcome the heuristics and potential bias of assuming it is a disease mostly affecting women, and predominantly women of color.

Evidently, new information detailing lab results that would be frequently observed in SLE (ANA 1:320) and eliminate some differential diagnoses, did not modify the race and sex distribution of correct SLE diagnoses. It is plausible that PCPs did not sufficiently adjust to the additional information provided in the lab results when determining their final

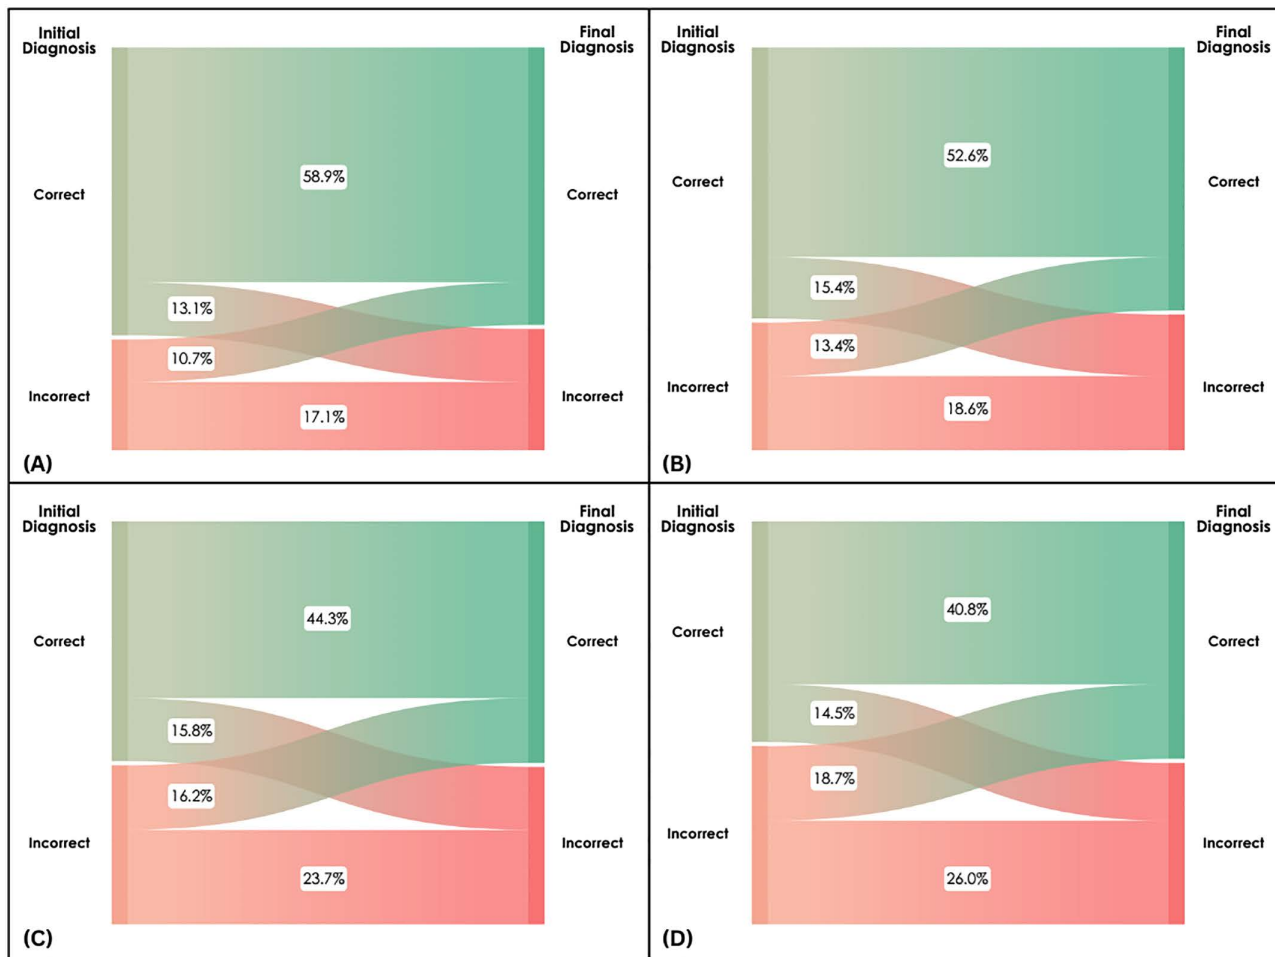

**Fig 1. Flow of participant correct and incorrect responses from initial to final diagnosis presented according to the jointly randomized race and sex version of the SLE case vignette. (A) Black female case, (B) White female case, (C) Black male case, and (D) White male case.**

<https://doi.org/10.1371/journal.pone.0342328.g001>

diagnosis (i.e., anchoring and inappropriate adjustment heuristic). In fact, PCPs' review time at final diagnosis was markedly faster compared to initial diagnosis and showed less variability among race and sex versions of the case. These findings may emphasize a need to develop mitigation strategies, such as decision support tools, that prompt physicians to consider a diverse clinical presentation of SLE. For example, evidence based on simulated cases suggests that physician use of artificial intelligence (AI) for decision support could enhance diagnostic reasoning and accuracy [14–16]. Nonetheless, many questions and concerns remain, including the susceptibility of large language models to existing bias, provision of physician training on AI prompting techniques, and protection of patient confidentiality [14,15]. We should also be cognizant of patients' reciprocal use of AI which, on one hand, could shorten the time to diagnosis, but could also perpetuate misinformation.

Our examination of PCPs' next steps after initial case presentation offered insight into their diagnostic certainty. Most PCPs elected to order laboratory tests and ANA levels were requested by 79% of participants with SLE as an initial differential diagnosis; interestingly this proportion was highest for the participants who viewed the White male vignette. In contrast, only half of PCPs ordered ANA levels when SLE was not on their initial differential diagnosis. Taken together, White male cases were the least likely to receive a correct diagnosis, yet when SLE was a differential diagnosis, they were the



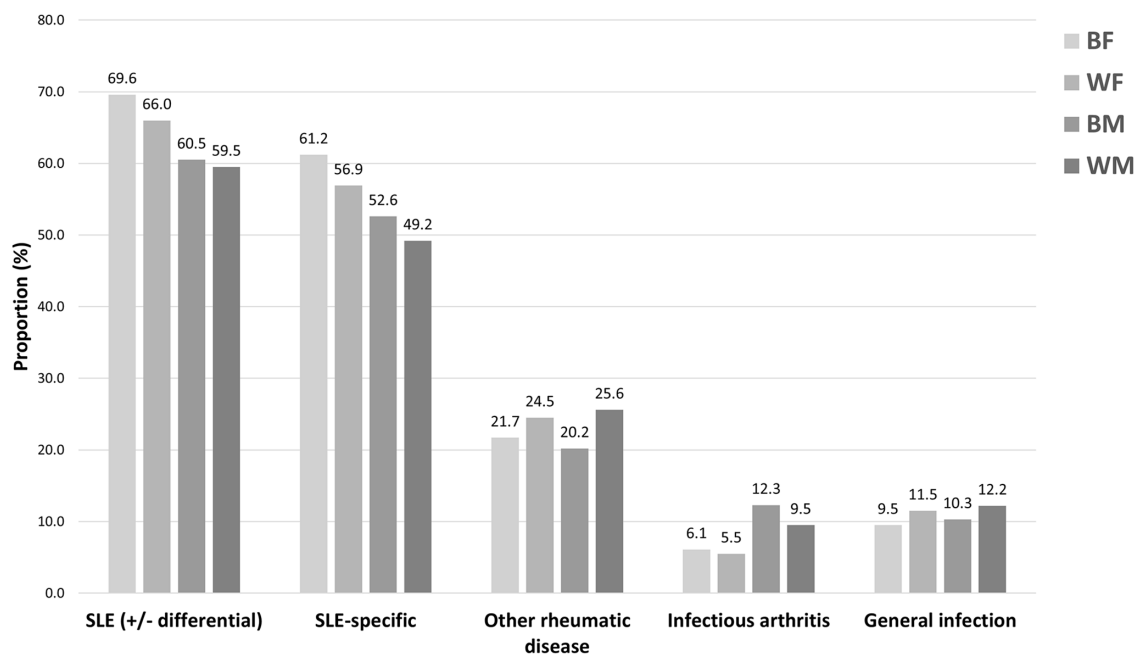

**Fig 2. Participants' final diagnosis for SLE clinical vignettes with race and sex jointly randomized.** Presented diagnoses are for categories that were recorded by  $\geq 5\%$  of participants. Responses for 'other rheumatic disease' included rheumatoid arthritis, osteoarthritis, inflammatory arthritis, Behcet's, and connective tissue diseases. All diagnostic categories aside from SLE-specific are not mutually exclusive. SLE (+/- differential) refers to participant responses that included SLE and may have also included an additional differential diagnosis. SLE-specific refers to participant responses that definitively stated SLE. Abbreviations: BF – Black Female; BM – Black Male; SLE – systemic lupus erythematosus; WF – White Female; WM – White Male.

<https://doi.org/10.1371/journal.pone.0342328.g002>

most likely to have ANA checked. This may represent lower certainty in the diagnosis as respondents may have needed more evidence despite otherwise identical clinical findings. Though as noted, additional lab results did not modify the race and sex distribution of correct SLE diagnoses at the final stage. These findings may also reflect racial differences in the provision of diagnostic tests. A 2024 cross-sectional analysis using US emergency and inpatient claims data reported that Black patients were significantly less likely than White patients to receive related diagnostic tests for non-specific discharge diagnoses [17]. Authors postulated these disparities may be shaped by race-based differences in triage practices, patients' access to primary care, and implicit bias in clinical decision-making [17]. Future research, including the use of qualitative methods, to understand the causes and consequences of racial disparities in the provision of appropriate diagnostic testing for SLE is needed. This gap in practice may also reflect a broader issue in primary care regarding the recognition of autoimmune diseases. Implementing automated clinical reminders and reinforcing guideline-based care may help mitigate these discrepancies.

Delays in SLE diagnosis within primary care may contribute to health disparities, particularly for less representative cases. A cross-sectional study estimated the median time to SLE diagnosis after symptom onset was four years and longer delays were associated with worse clinical outcomes [18]. Diagnostic delays in SLE can be attributed to the absence of a definitive diagnostic test and sometimes non-specific initial symptoms. Our factorial survey experiment suggests there may also be a role for cognitive errors during clinical decision-making. In our study, only 60% of male cases received a final diagnosis of SLE and overall, very few cases were referred to rheumatology (8%). If SLE goes undiagnosed and untreated, it may worsen over time and evolve into more severe phenotypes [19,20]. Thus, if the diagnostic threshold for males is higher, this difference could contribute to males experiencing more severe phenotypes and damage at diagnosis,

ultimately leading to poorer prognosis. Indeed, an analysis of a population-based lupus registry showed that males had a 1.6-fold higher rate of lupus nephritis and a 2.1-fold increased rate of thrombocytopenia compared to females [3]. Nevertheless, males with SLE may also have an intrinsically more severe phenotype independent of cognitive bias.

A major strength of this research is the study design, which jointly randomized the “exposure” of race (Black/White) and sex (male/female) while holding constant all clinical context of the case vignette. We incorporated a secondary measure of review time that is consistent with other measures of implicit bias but also considers cognitive load [21]. Cognitive heuristics often reduce cognitive load; however, our measure of review time may demonstrate that the effort required to override cognitive heuristics might increase a physicians’ cognitive load. There are also limitations to consider. First, case vignettes do not fully represent real-world clinical practice and rather reflect diagnostic tendencies and cognitive processes elicited under controlled vignette-based conditions. The clinical vignettes and the format may trigger exam-based thinking in participants, inadvertently leading them to rely more on cognitive shortcuts and descriptive epidemiology. We also did not consider how physician personality traits influence medical decisions. A systematic review found low tolerance to risk and overconfidence was associated with diagnostic inaccuracies [22]. Regardless, our randomized design is presumed to have equally distributed these personality traits and other confounding variables across race-sex case versions. Although respondents comprised a small percentage of contacted PCPs, our sample was generally representative of the internal and family medicine workforce per the 2023 American Association of Medical Colleges (AAMC) workforce dashboard [23]. The AAMC dashboard indicates a higher proportion of male PCPs (60.1% internal medicine, 56.2% family medicine) and a majority aged 40–64 years (57.5% internal medicine, 58.6% family medicine), while our sample had 57.0% men with an average age of 52 years. Racial distribution was somewhat similar, with 67.9% white, 24.4% Asian, and 2.4% Black in our sample, compared to 57.9% white, 15.3% Asian, and 6.2% Black in the US family medicine workforce (10–14% of AAMC race and ethnicity data unknown) [23].

Our factorial survey experiment demonstrates that a case vignette’s race and sex significantly influence a PCP’s likelihood of correctly diagnosing SLE despite vignettes having otherwise identical clinical information. In practice, this may have negative consequences for patient care and clinical prognosis. Thus, efforts to reduce known health disparities among the SLE population should consider the role of cognitive biases in clinical decision-making. In acknowledging both the difficulties in diagnosing SLE along with the critical role PCPs occupy in facilitating early diagnosis and treatment, it is essential to explore opportunities that improve the diagnosis of SLE in primary care. An emerging opportunity, the integration of AI into physician diagnostic decision-making, requires thoughtful consideration of how to best implement it in clinical practice, ensuring that it enhances patient care by balancing accuracy, usability, and ethical concerns.

## Supporting information

### **S1 Appendix. Systemic lupus erythematosus case description.**

(DOCX)

### **S2 Appendix. Classification of participant responses.**

(DOCX)

**S1 Fig. Overview of factorial survey experiment.** Abbreviations: ANA – antinuclear antibody; CRP – C-reactive protein; ESR – erythrocyte sedimentation rate; PCP – primary care physician; SLE – systemic lupus erythematosus.

(TIF)

### **S2 Fig. Flow of primary care physician (PCP) survey email invitations, survey completion, and eligibility.**

(TIF)

### **S1 Table. Participant demographics stratified according to randomly assigned case vignette (n = 1031).**

(DOCX)

**S2 Table. Participants (n = 1031) initial diagnoses listed in their overall differential, independent of rank, presented according to jointly randomized race and sex version.**

(DOCX)

**Author contributions**

**Conceptualization:** Alyssa Howren, Quan L. Tran, Sadaf Sediqi, Saadiya Hawa, Douglas K. Owens, Eleni Linos, Titilola O. Falasinnu, Yashaar Chaichian, Julia F. Simard.

**Data curation:** Alyssa Howren, Sadaf Sediqi, Julia F. Simard.

**Formal analysis:** Alyssa Howren, Sadaf Sediqi, Julia F. Simard.

**Funding acquisition:** Douglas K. Owens, Yashaar Chaichian, Julia F. Simard.

**Investigation:** Alyssa Howren, Quan L. Tran, Sadaf Sediqi, Saadiya Hawa, Douglas K. Owens, Eleni Linos, Titilola O. Falasinnu, Yashaar Chaichian, Julia F. Simard.

**Methodology:** Alyssa Howren, Quan L. Tran, Sadaf Sediqi, Saadiya Hawa, Douglas K. Owens, Eleni Linos, Titilola O. Falasinnu, Yashaar Chaichian, Julia F. Simard.

**Project administration:** Alyssa Howren, Julia F. Simard.

**Resources:** Julia F. Simard.

**Software:** Alyssa Howren, Julia F. Simard.

**Supervision:** Douglas K. Owens, Yashaar Chaichian, Julia F. Simard.

**Validation:** Alyssa Howren, Sadaf Sediqi, Julia F. Simard.

**Visualization:** Alyssa Howren, Julia F. Simard.

**Writing – original draft:** Alyssa Howren, Julia F. Simard.

**Writing – review & editing:** Alyssa Howren, Quan L. Tran, Sadaf Sediqi, Saadiya Hawa, Douglas K. Owens, Eleni Linos, Titilola O. Falasinnu, Yashaar Chaichian, Julia F. Simard.

**References**

1. Izmirly PM, Parton H, Wang L, McCune WJ, Lim SS, Drenkard C, et al. Prevalence of systemic lupus erythematosus in the United States: estimates from a meta-analysis of the centers for disease control and prevention national lupus registries. *Arthritis Rheumatol*. 2021;73(6):991–6. <https://doi.org/10.1002/art.41632> PMID: 33474834
2. Dall'Era M, Cisternas MG, Snipes K, Herrinton LJ, Gordon C, Helmick CG. The incidence and prevalence of systemic lupus erythematosus in San Francisco County, California: the California Lupus surveillance project. *Arthritis Rheumatol*. 2017;69(10):1996–2005.
3. Maningding E, Dall'Era M, Trupin L, Murphy LB, Yazdany J. Racial and ethnic differences in the prevalence and time to onset of manifestations of systemic Lupus Erythematosus: the California Lupus surveillance project. *Arthritis Care Res (Hoboken)*. 2020;72(5):622–9. <https://doi.org/10.1002/acr.23887> PMID: 31115180
4. Andrade RM, Alarcón GS, Fernández M, Apte M, Vilá LM, Reveille JD, et al. Accelerated damage accrual among men with systemic lupus erythematosus: XLIV. Results from a multiethnic US cohort. *Arthritis Rheum*. 2007;56(2):622–30. <https://doi.org/10.1002/art.22375> PMID: 17265497
5. Nusbaum JS, Mirza I, Shum J, Freilich RW, Cohen RE, Pillinger MH. Sex differences in systemic lupus erythematosus: epidemiology, clinical considerations, and disease pathogenesis. *Mayo Clin Proc*. 2020;95(2):384–94.
6. Addis ME, Mahalik JR. Men, masculinity, and the contexts of help seeking. *Am Psychol*. 2003;58(1):5–14. <https://doi.org/10.1037/0003-066x.58.1.5> PMID: 12674814
7. Feldman CH, Broder A, Guan H, Yazdany J, Costenbader KH. Sex differences in health care utilization, end-stage renal disease, and mortality among Medicaid beneficiaries with incident lupus nephritis. *Arthritis Rheumatol*. 2018 Mar;70(3):417–26.
8. Buie J, McMillan E, Kirby J, Cardenas LA, Eftekhari S, Feldman CH. Disparities in lupus and the role of social determinants of health: current state of knowledge and directions for future research. *ACR Open Rheumatol*. 2023;5(9):454–64.
9. Bane S, Falasinnu T, Espinosa PR, Simard JF. Misdiagnosis, missed diagnosis, and delayed diagnosis of lupus: a qualitative study of rheumatologists. *Arthritis Care Res (Hoboken)*. 2024;76(11):1566–73. <https://doi.org/10.1002/acr.25405> PMID: 39037219

10. Simard JF, Chaichian Y, Rizk N, Rector A, Feldman CH, Falasinnu TO. Are we missing lupus in males? Evidence of cognitive bias from a randomized experiment in the United States. *Am J Epidemiol*. 2022;191(1):230–3. <https://doi.org/10.1093/aje/kwab199> PMID: 34308469
11. Siegel CH, Sammaritano LR. Systemic lupus erythematosus: a review. *JAMA*. 2024;331(17):1480–91. <https://doi.org/10.1001/jama.2024.2315> PMID: 38587826
12. Feldman CH, Hiraki LT, Liu J, Fischer MA, Solomon DH, Alarcón GS, et al. Epidemiology and sociodemographics of systemic lupus erythematosus and lupus nephritis among US adults with Medicaid coverage, 2000–2004. *Arthritis Rheum*. 2013 Mar;65(3):753–63.
13. Dawson NV, Arkes HR. Systematic errors in medical decision making: judgment limitations. *J Gen Intern Med*. 1987;2(3):183–7. <https://doi.org/10.1007/BF02596149> PMID: 3295150
14. Hsuen Y, Rubin R. An AI chatbot outperformed physicians and physicians plus AI in a trial—what does that mean?. *JAMA*. 2025;333(4):273–6.
15. Goh E, Gallo R, Hom J, Strong E, Weng Y, Kerman H, et al. Large language model influence on diagnostic reasoning: a randomized clinical trial. *JAMA Netw Open*. 2024;7(10):e2440969. <https://doi.org/10.1001/jamanetworkopen.2024.40969> PMID: 39466245
16. Krakowski I, Kim J, Cai ZR, Daneshjou R, Lapins J, Eriksson H, et al. Human-AI interaction in skin cancer diagnosis: a systematic review and meta-analysis. *NPJ Digit Med*. 2024;7(1):78. <https://doi.org/10.1038/s41746-024-01031-w> PMID: 38594408
17. Ellenbogen MI, Weygandt PL, Newman-Toker DE, Anderson A, Rim N, Brotman DJ. Race and ethnicity and diagnostic testing for common conditions in the acute care setting. *JAMA Netw Open*. 2024;7(8):e2430306. <https://doi.org/10.1001/jamanetworkopen.2024.30306> PMID: 39190305
18. Kernder A, Richter JG, Fischer-Betz R, Winkler-Rohlfing B, Brinks R, Aringer M, et al. Delayed diagnosis adversely affects outcome in systemic lupus erythematosus: cross sectional analysis of the LuLa cohort. *Lupus*. 2021 Mar 5;30(3):431–8.
19. Faurschou M, Dreyer L, Kamper AL, Starklint H, Jacobsen S. Long-term mortality and renal outcome in a cohort of 100 patients with lupus nephritis. *Arthritis Care Res (Hoboken)*. 2010;62(6):873–80.
20. Oglesby A, Korves C, Laliberté F, Dennis G, Rao S, Suthoff ED, et al. Impact of early versus late systemic lupus erythematosus diagnosis on clinical and economic outcomes. *Appl Health Econ Health Policy*. 2014;12(2):179–90. <https://doi.org/10.1007/s40258-014-0085-x> PMID: 24573911
21. Greenwald AG, McGhee DE, Schwartz JL. Measuring individual differences in implicit cognition: the implicit association test. *J Pers Soc Psychol*. 1998;74(6):1464–80. <https://doi.org/10.1037//0022-3514.74.6.1464> PMID: 9654756
22. Saposnik G, Redelmeier D, Ruff CC, Tobler PN. Cognitive biases associated with medical decisions: a systematic review. *BMC Med Inform Decis Mak*. 2016;16(1):138. <https://doi.org/10.1186/s12911-016-0377-1> PMID: 27809908
23. Association of American Medical Colleges. U.S. physician workforce data dashboard. Accessed 2025 July 1. <https://www.aamc.org/data-reports/report/us-physician-workforce-data-dashboard>
